# Supplementary material for: Confined fission track revelation in apatite: how it works and why it matters
Source: Copernicus journal article supplement (doi:10.5194/gchron-2020-31), 2020-10-20
Supplement: Supplementary file [file gchron-2020-31-AC1-supplement.pdf]

## **Answers to comments on manuscript Confined fission track revelation in apatite: how it works and why it matters**

Richard Ketcham and Murat Tamer

Our answers are below in *red italics*.

### **Answers to comments by Paul Green**

The paper under review (henceforth “the ms”) presents results of a series of calculations and models regarding the revelation of fission tracks in apatite, with detailed discussion of the implications. The subject matter falls within the remit of the Journal and would be of interest to a sub-set of readers. However, I have to say that the ms is written in a style that I found very difficult to follow, and required several readings before I began to understand the overall aims of the paper and the reasoning behind the work described therein. One of the main reasons for this is that the study relies on data and discussion presented in a companion paper (Tamer and Ketcham, 2020) and other works. In addition, or perhaps as a result, many aspects of the work described in the ms are unexplained, or difficult to follow, simply being referenced to previous papers. In fact, I only really began to get a clear idea of the rationale behind the work, together with the experimental design and significance of the analytical results after I had read a series of previous papers going back to Wauschkuhn et al (2015), which appears to form the foundation for these later studies. Needless to say, I regard this as an unnecessary level of effort required to provide a review of a new contribution. The text is also replete with vague expressions which have unclear implications, as well as inaccurate statements or misunderstandings and non-intuitive results that are accepted without question. Some examples are cited below, but this is not an exhaustive list and the authors need to make an effort to explain their procedures and reasoning in a lot more detail.

*This contribution is indeed built upon and/or informed by recent studies, as well as older ones; this is the way things normally work. We have attempted to balance explanation with brevity, and will endeavor to do better during revisions.*

Perhaps the biggest problem with the ms is that it is founded on a complete misconception of the application of apatite fission track thermochronology, emanating from the paper by Wauschkuhn et al (2015). To quote from the manuscript under review (lines 26 – 28):

*Measurements of laboratory-annealed spontaneous and induced fission tracks do not agree (Wauschkuhn et al., 2015b), leading to continuing uncertainty on the fidelity of induced tracks annealed in the laboratory as proxies for spontaneous ones annealed at geological conditions over geological time scales.*

The paper by Wauschkuhn et al (2015) casts doubt on the use of kinetic models based on laboratory annealing studies of induced fission tracks in apatite to predict the behaviour of spontaneous tracks in geological conditions. I note that if this doubt were to be well founded, then the very basis of the apatite fission track method, as implemented for example in the HeFTy software of the first author, would be invalid. The Wauschkuhn et al (2015) study is based on the assumption that samples from the KTB borehole in Germany have undergone essentially isothermal annealing since the rock section cooled to temperatures at which tracks were retained. This seems highly unlikely, given both the geological evolution of the region which contains a series of tectonic events during the Cenozoic (discussed in detail by Wauschkuhn et al., 2015) and also a number of previous studies which have revealed a more complex thermal history framework for samples from the borehole. Wauschkuhn et al (2015) claim that the various aspects of the thermal history invoked to explain the apatite data in samples from shallow depths in the borehole cannot be believed, due to an absence of independent evidence. But they then proceed to invoke a novel physical process for which there is also no independent evidence, to explain these data. They thus simply replace one enigmatic process with another. A borehole such as the KTB, where a range of factors may contribute to the thermal history of individual rock samples, cannot and should not be used to provide a geological test of annealing behaviour.

*We agree that interpreting the KTB data set is very difficult, and we do not agree with all of the analysis and interpretations by Wauschkuhn et al (2015). At the same time, we appreciate the long-term project of that research group to improve the foundations of apatite fission-track analysis, which includes revisiting assumptions that are often taken for granted but may not hold up under closer scrutiny.*

*However, the reviewer is misdirected; we were not referring to the KTB data and its interpretation at all, but instead to the experimental data set reported in their Table 2 and Figure 15 (we will clarify this during revision). That small study constitutes an examination of the equivalent time principle not undertaken by Duddy et al. (1988) in comparing the annealing behavior of fossil to induced tracks, by first pre-annealing induced tracks to the length of fossil ones, and then annealing fossil and pre-annealed induced tracks side by side. In these experiments, fossil tracks annealed more quickly than induced ones in these subsequent steps, seeming to violate the equivalent time hypothesis that tracks of the same length behave the same way, "totally independent of the conditions of temperature and time which caused the prior annealing."*

*The reviewer appears to agree with Wauschkuhn et al. (2015) in claiming that any failure of the equivalent time hypothesis, or some other assumptions embedded into fission-track thermal history modeling by HeFTy and other software, invalidates the entire method. We believe that this is an overreaction. As we know, "all models are wrong, but some are useful" (George Box, co-creator of the Box-Cox transform used by Laslett et al. (1987)); even if an assumption is not precisely*

*correct, the question remains of how much this incorrectness affects model predictions. The best way to answer this question is to study the problems more closely.*

Thankfully, there is ample published evidence showing that the view expressed in the paragraph quoted above is without foundation. In my 1988 paper (cited in the ms) I described a series of experiments which showed that spontaneous tracks anneal in similar fashion to induced tracks once the induced tracks were shortened to a similar degree to the spontaneous tracks (this is not mentioned in the ms).

*The Green (1988) data do not include a pre-annealing step equivalent to that reported in Wauschkuhn et al. (2015), which is why we did not mention it. The experiment in Wauschkuhn was designed very specifically to test the equivalent time hypothesis in a way Green (1988) did not.*

This is an expression of the concept of equivalent time, originally introduced by Duddy et al. (1988) (not cited in the ms). A vitally important fact, that neither the paper under review nor any of the preceding papers have mentioned, is that Duddy et al. (1988) performed a series of careful laboratory experiments to validate this concept.

*We discussed our data with respect to Duddy et al. (1988) in our previous paper, but we can bring some of that discussion forward here to reinforce it. We agree that Duddy et al (1988) is an effective verification of the equivalent time hypothesis, but only on laboratory-annealed induced tracks. It did not, and could not, test the equivalent time hypothesis against geological annealing. In our previous paper, we showed evidence that the etching structure of spontaneous and equivalent-length-annealed tracks are different, and in this paper, we further quantify that laboratory annealing substantially accelerates etching.*

*Does these various observations invalidate the equivalent time hypothesis? In a sense, perhaps, but not necessarily catastrophically. Perhaps it is roughly true on both geological time scales and laboratory time scales, but not between the two, because some processes operate on one time or temperature scale and not the other, such as background radiation damage.*

In similar vein, a number of studies have shown that the predictions of fission track annealing models are consistent with measured data in a range of different geological conditions, e.g. Spiegel et al. (2007); Green and Duddy (2018), while other studies (e.g. Green and Duddy, 2010; Japsen et al., 2020; Green et al., 2013, 2018) have reported results from apatite fission track methods which are highly consistent with other paleo-thermal (e.g. vitrinite reflectance) and paleo-burial (e.g. sonic velocity) indicators. None of these studies confirming the equivalence of spontaneous and induced tracks and the validity of apatite fission track methods, have been cited in the ms or its preceding papers. Thus it is my view that the ms is based on a false premise and provides a biased view of the state of the technique. If spontaneous tracks did not behave in similar fashion to induced

tracks then surely it would not be possible to use the technique to accurately predict track response in geological conditions. In my view, the failure of this and other papers to cite evidence which oppose their own views represents a serious failure to follow established practices in scientific publication.

*We do not disagree that a range of studies have shown AFT data to be consistent with other techniques, to within their respective time and temperature resolutions, in those settings. This track record provides grounds for believing that the deleterious effects of some underlying assumptions being incorrect or inexact is limited. However, it is certainly not grounds for believing that all of our underlying assumptions are perfect. Sometimes we can be only approximately right, or right for the wrong reasons.*

*The reviewer misinterprets that we are trying to knock down the technique. We are not. We are making the case, however, that we don't know everything we thought we did, and it would be good to figure it out.*

The ms suffers from another serious shortcoming is that although not stated explicitly, it suggests that etching of confined tracks is the only consideration in determining appropriate etch times. In practice the etch time is also required to ensure that tracks which intersect the grain surface (i.e. those employed in determining a fission track age) are clearly revealed, to allow accurate counting without too many overlaps which might obscure some tracks. In addition, in routine application involving natural samples, particularly in the case of detrital grains in sandstones, grain mounts invariably contain apatites with a range of bulk etching rates, so that tracks in some grains will be etched to a greater degree than in others. Thus, the typical etch time of 20 seconds represents a balance between the need to sufficiently reveal tracks in grains with the lowest etch rates while not obscuring tracks in grains with higher etch rates. Accepting this view, and given the importance of measuring track lengths and ages in the same grains (although sadly this is often not done), it is difficult to see how the results of this study could find any practical application. Perhaps the authors should give some consideration as to how their work could be implemented in practical application.

*We did mention the competing consideration of density measurements at the end of section 6.6, but we agree that we can be more holistic in discussing what goes into selecting an etching technique, and will do this during revisions. We don't consider this to be a "serious shortcoming", however. First, it is worthwhile in and of itself to develop a quantitative understanding of how to maximize efficiency of confined track revelation. Second, we did give some consideration in our section 6.6, which we can further clarify and develop; for example doing a single, standard etch for density and preliminary length measurement can be followed by a short re-etch and revisiting the same grains in a second measurement step, which is made relatively easy by modern software.*

Another issue, which the authors appear to discount, is that if measurements (including annealing experiments and data in field samples) are standardized to the same etching

and measurement conditions, then the effects that they are discussing in this ms should not be a problem. This has certainly been our philosophy at Geotrack since 1982. In our early days, we performed several standardization exercises with personnel from other laboratories to ensure that similar measurement protocols were adopted. However in recent years the explosion of laboratories around the world has resulted in a considerable number that have not shared that consistent approach.

*We disagree. The weakness of relying on this approach is documented in this and previous studies. We see in inter-laboratory experiments that even identical etching conditions lead to divergent results in the community (Ketcham et al., 2015). Standardizing etching and measurement conditions does not resolve what we propose to be the decisive variable, which is the choices the analyst makes. This has long been suspected, or even informally understood, but not quantified. Before this study, the primary response has been for experienced workers to tut-tut the "explosion" of new and implicitly under-trained laboratories (and perhaps tut-tut similarly experienced workers who nevertheless get different answers). Fission-track length measurements should not be a morality play. We believe that a quantitative understanding of track etching can help in the development of a more productive response.*

Another motivation for the study described in the ms concerns the disappointing degree of reproducibility of track length measurements in inter-laboratory comparisons (lines 59-60). The authors may be better advised to focus on this aspect, rather than any perceived problems with the equivalence of spontaneous and induced tracks. A lack of standardization between laboratories is likely to be a major feature in causing the observed lack of reproducibility.

*We believe both problems deserve focus, and that they are not unrelated.*

Another important issue with one aspect of the analytical procedures adopted in the study concerns the measurement of under-etched tracks. The previous paper (Tamer and Ketcham, 2020b) discusses "a limited number of tracks that remained under-etched at 20 s but were measured anyway to adhere to the experiment design". This allows a certain degree of arbitrariness into the measurements which makes it difficult to know how to interpret differences from one etch step to the next. This issue is also referred to in the following list in relation to lines 74-77 and 194-196. The question arises of how the ends of under-etched tracks were measured, and what such measurements mean. The resolution of the track end points becomes a critical issue and where the width of a track is less than 1  $\mu\text{m}$  we are talking about measuring objects with a size close to the wavelength of light. So do these measurements indicate the actual etched length or only some part of that governed by resolution? Thus there is a question of how much the scatter in the measurements is due to problems in resolving track tips and how much is due to real differences in etch rates. This is also an issue with measurement of  $D_{\text{per}}$ , all of which are around the wavelength of light or less. This would account for the degree of

scatter in the Dper measurements in Figure 5c of Tamer and Ketcham (2020b). For these reasons, some discussion of how the authors dealt with this problem is required.

*This is an excellent point, and we agree that this is a very important consideration that deserves more emphasis. However, we believe that the “etch-anneal-etch” experiments of Tamer and Ketcham (2020) resolve the question. In that experiment, following the initial 10-second etching step and annealing, there was another 10-second step, followed by a 5-second one. We assume that annealing will not affect an etched track. If there had been a significant extent of etched track not included in the length measurement after the initial 10s due to the track tip being too thin to resolve, we would expect that the etching rate would have been faster in the first post-annealing etching step than the second, as the invisible part of the etched track would have been revealed, in addition to bulk etching at the track tip. We did not observe this -- in all three experiments the track length increased at a near-constant rate after annealing, in both steps.*

Specific comments regarding the text:

Line 60: *the region along tracks beyond where most current etching protocols reach*

The meaning of this is unclear.

*We can clarify (it's because they start step etching after 20s).*

Lines 44-48: *Virtually all mathematical treatments of track revelation, biasing, and the relationship between confined track length and track density (... ..) presume that tracks are line segments in space, all etched to their full extents once they are intersected.*

This is inaccurate, at least in terms of those papers involving Galbraith, Laslett and our group. These mathematical treatments are based on the assumption that only tracks that are etched to their full extent are measured. This is not the same as the statement quoted from the ms.

*The reviewer is incorrect. All of the mathematics in those papers, and the papers they relied on (e.g. Parker and Cowan 1976), only encompass relative probability of intersection. None mention time in the etching process. They thus make the implicit assumption that probability of intersection is equal to probability of measurement. They omit the possibility that different tracks may be differently likely to be fully or sufficiently etched after intersection.*

*We also note that the reviewer has little quantitative basis for saying that tracks are etched to their full extent. If “full extent” means the entire region of enhanced etching rate, we document that the full extent of unannealed tracks in Durango apatite (years after irradiation) is about 17  $\mu\text{m}$ .*

Lines 73-74: *Finally, to be measured a confined track must be etched sufficiently to be observed, the criteria for which will differ depending on the situation.*

What does the second part of that statement mean?



*This is clarified in the following sentences; we can clarify further (“to be observed” was admittedly clumsy; should have been “seen and judged suitable for measuring” or something like that).*

Lines 74-77: *For routine AFT analysis, where the analyst evaluates whether a track is sufficiently etched, the ends of the tracks need to be clearly visible, although this evaluation is analyst-specific. For measuring tracks in early steps of step-etching experiments, the criterion is simply that a track and its tips be visible enough to make a reasonable measurement.*

There is an underlying question here that pervades the ms as well as preceding papers; what criteria should be used in measuring tracks where the ends are not properly visible? This needs to be discussed – at least, the authors should discuss the approach that they used here.

*We can elaborate somewhat, but only to a limited degree. The principal criterion was to be confident that the end was visible, and that it was not a gradational fading into nothingness. As discussed previously in this response, follow-up measurements indicated that this resulted in no “missing length” beyond the track tip.*

Lines 87-88: *There was no clear indication of  $v_B$  varying with track orientation (Tamer and Ketcham, 2020b)*

I find this puzzling. Surely the shape of the track openings in a prismatic surface shows that the bulk etch rate is higher in the direction of the c-axis than perpendicular to it. In this context I am puzzled as to why the authors have adopted the value of  $0.022 \mu\text{m/s}$  for the bulk etch rate, when other samples from the same experiment define different growth rates, and this value is intermediate between the growth rate of  $D_{\text{par}}$  and  $D_{\text{per}}$ .

*We found it puzzling as well, but the simple fact was that there was no clear signal in our measurements, even though we were expecting one. The signal was just not large enough to emerge from the noise; the fact that two of our experiments featured relatively few low-angle tracks. We agree with the reviewer that there probably really is a difference, but rather than assert some larger truth we decided to just stick with what our data said at this time.*

Lines 92-93: *In cases where it was difficult to determine if an intersection truly occurred due to interfering features, we conservatively included it.*

I would say that a conservative approach (meaning careful, in my view) would be to exclude such values.

*The reviewer misinterprets what we mean by “conservative.” The principal mechanism by which our etch rate determinations can be wrong is if multiple intersections lead to an artificial, apparent acceleration of etching due to different ends of the track etching simultaneously. We thus wanted to challenge the veracity of our etch rates as strongly as possible by including ambiguous cases.*

Line 94: Section 4 heading. "4. The model"

What model? Up to this point there has been no description of what is to be modelled or why. This needs to be explained and the basis of the model should be described. The reader should not have to work this out for him/herself.

*This critique is incorrect. We introduce "the model" on lines 50-54.*

Line 121: Figure 2 illustrates the implied growth curves

What is meant by "growth curves"? An informed reader can probably work this out but the content of the Figure should be explained more clearly. And in C,D, why are curves not shown for  $t=20$  sec? What values of  $V_T$ ,  $V_B$  have been used in constructing this figure? And in regard to Lines 129-130, It seems unlikely that differing intersection times would contribute significantly to differences between observers if other requirements of measurement (in terms of tip shape) are met, on the basis of this Figure.

*We can clarify by calling them "lengthening curves." Part of the reviewer's question is answered in the very next part of the sentence he quotes ("... using Constant-core model rates for unannealed tracks calculated later in this paper (Table 2)"). We can also include similar text in the caption, if that helps. We did not include 20 seconds because, simply, no confined track is etched for 20 seconds in a 20-second etch, because first a semi-track has to etch down to reach it. (We feel that this work requires a certain amount of unlearning by even experienced fission trackers; shortcut like "confined tracks etch for 20s in a 20s etch" are wrong). Concerning lines 129-130, we are not talking about variation among observers, but simply that tracks of the same true length will have a range of etched lengths after a given amount of etching, based solely on where they are impinged. We are putting it out there that this simple, inevitable mechanism explain part of the scatter observed in induced lengths.*

Lines 134-135: First, the relative probability of a track of latent length or half-length  $L$  crossing the surface

Is it latent length or half length? The two terms suggest different meanings.

*We agree that our phrasing is confusing, and can fix it. We were trying to convey that the statement is mathematically correct for both lengths and half-lengths. Half-length is used for the fundamental fission-track age equation (Fleisher, Price and Walker, 1975) because only one of the two fission particles can cross a given plane, and some readers may be used to thinking of things from that perspective.*

Line 138: The semi-track penetration calculation..... ..

Line 150: Figure 3 shows examples of penetration and revelation rate.



Both of these extracts from the text represent one of the most confusing aspects of the paper, at least as far as I am concerned. I cannot work out what Figure 3 is supposed to show, and the text provides no information that will help to work it out. Simply “penetration and revelation rate”. These terms should be explained in detail.

*We can do that. Penetration refers to the etching of semi-tracks, revelation refers to intersection and etching of internal tracks by the etching semi-tracks.*

Line 165: *Figure 4 shows an example model of 107 track intersections*

This Figure doesn't show a model. It shows results from a model. Maybe I'm old fashioned but I think text should be clearly written, describing what is shown accurately and clearly.

*We will endeavor to improve.*

Lines 194-196: *For step etching experiments with first steps shorter than 20 s, precise location of the tip is not a prerequisite for track selection, which is instead a matter of simple visibility. In the earliest stages of etching, tracks will be too thin to be observable in visible light. As they grow, they become more efficient at reflecting light, making them more detectable. However, when this occurs in the context of practical fission track analysis is unclear.*

This is not clear to me. To measure a track it is necessary to identify the end, so how did the authors decide where the ends were?

*We addressed this in our initial comments; we will clarify.*

Line 197: *Lacking a physical basis for determining when etched tracks begin to become visible*

This follows on from above. I find this section very confusing. Constructing an empirical bias relationship to allow for this aspect seems a very imprecise solution. Why should the same bias function apply in all cases?

*We agree that this is an imprecise solution, but we are trying to quantify something nobody has quantified before: predict which barely-etched tracks an analyst will see and select and which ones will either be missed or rejected. It's a difficult problem, and we certainly welcome improvements. The same bias function should apply in all cases here because it is the same analyst using the same instrumentation, attempting to do the same thing each time.*

Lines 210-211: *Figure 7 shows the distribution of track lengths and etching times with depth below the surface*

This Figure does not show the distribution of lengths and etch times. It shows model predictions in terms of contours. Once again, precise description is important. Plus more description

*We can insert “predicted”.*

Lines 218-219: *Fitting the experimental data consists of posing an etching structure and using it to construct first a semi-track distribution and then a distribution of etched lengths*

What is being fitted to what here? This should be explained clearly.

*Mean track lengths for each etching step, as explained in the sentence start in line 220.*

Lines 221-222: *We also include the option to incorporate some innate variation in latent track length. For the modeling in this paper we chose  $\sigma$  of  $0.5 \mu\text{m}$ , based on the scatter of lengths after c-axis projection to remove anisotropy effects*

Wouldn't a value of 0.8 or so be more appropriate, based on the distribution of induced track lengths which show no anisotropy?

*No, because some variation in etched length arises from variation in the impingement point (Fig. 2C, D), not variation in latent length. We will clarify that we removed an estimate of this component of error in selecting this value.*

It would also be interesting to run models with a single latent length, to investigate how much of the observed distribution of measured track lengths can be attributed simply to etching processes.

*Our initial models were like this, but we did not want to go into this particular detail in the interest of keeping the paper shorter. We report on line 224 that the effect is minor.*

Lines 229-232: *The step etch experiments only consist of 3-5 steps, making it difficult to meaningfully constrain models with 2-3 variables defining etching structure, in addition to biasing factors. To increase the amount of data, we paired data sets based on the same or equivalent tracks. Thus, we simultaneously fit data sets SE1 and SE2, both of which analyzed unannealed induced tracks, but with different initial etching steps.*

This is another of the most ambiguous passages in the ms. In what sense were the data sets paired? What does that mean? Why try to fit models with 2-3 variables to data with only 3 to 5 steps? Why not try simpler models or use more etch steps to resolve these problems? And why combine data with different initial etch times? More control on experimental design would ameliorate these issues.

*We are working with the data we have, and will certainly do more in the future. Pairing is simply using two sets of etching steps on the same material (i.e. at the same level of annealing, often re-polishing the very same grains); we will clarify that. It's tough to get simpler than a model of 2 variables. Combining data with different initial etching times is actually a feature, not a bug, as it tests whether the model can explain a wider range of data. For example, as discussed in the paper, one might expect to get a different track length distribution if one selects tracks after 10 seconds and then measures them again after 10 more seconds of etching, versus if one just etches for 20 seconds and uses one's standard-operating-procedure selection criteria.*

Lines 241-245: *During fitting of the unannealed induced track data (SE1 and SE2), it became apparent that one pair of data points were exerting outsized control on the result. Since the 15-20 s and 20- 25 s steps for experiment SE2 feature the very similar mean length reduction and thus almost the same rate, in the context of our model forms assuming a linear rate decrease fits were forced to split this difference to the exclusion of closely fitting the rest of the data for SE1 and SE2. We thus excluded the 15-s mean length for SE2, effectively making the second etching step go from 10 s to 20 s*

I wonder if this presages graver issues within the data set. Why should this dataset be problematical? To simply reject these data seems rather arbitrary.

*One outlier in 28 experiments doesn't seem all that bad. We said we did what we did, and why we did it, so the reader can decide what to think about it.*

Line 268: *Figure 9 shows the parameter fits for Constant-core models, and Figure 10 for Linear models*

Here is the biggest single problem that I had with reviewing the ms. What on earth does this mean? This Figure shows a series of cross plots, without any description of what is being plotted or why, and what they mean. What does each dot represent in each plot? I find it totally unacceptable that the authors leave it to the reader to work this out.

*We will expand the figure caption; the information is nearby, in lines 249-252.*

Line 287: *It is remarkable that we are able to reproduce the mean length data in each etching step of all experiments simultaneously using these simple models of etching structure*

Give the number of adjustable parameters, each of which is free to vary as required until a fit is obtained, I don't see this as remarkable at all. And regarding the statement that mean length is reproduced, I guess that Figure 8 is supposed to show this, but a plot of measured vs fitted parameters would seem to be a more graphic depiction of this.

*There are only 2 or 3 adjustable parameters, which need to fit 4-7 data points in the 5 pairs of step-etch experiments. The reviewer should try it before he dismisses it. A residual plot is the clearest graphical way of comparing predictions to data and uncertainties. We could also do a typical 1:1 plot, but that would be less informative, and redundant.*

Line 329: *Fossil and unannealed induced tracks have slow core etching rates, while all annealed induced tracks have far higher rates.*

It is counter-intuitive that annealing would result in an increase in etch rates within the residual track region, particularly when spontaneous tracks do not show enhanced track rates. Such behaviour would suggest that heating increases the degree of damage, when all previous experience with lattice damage suggests that heating leads to a decrease in damage intensity. This suggests that there is a flaw in either the experimental design or

the model design from which this conclusion was derived. The authors seem to accept this observation at face value, but this unusual result deserves further investigation before any firm conclusions can be drawn.

*We found it counter-intuitive as well, and we devote lines 299-311 to our most likely suspect of a culprit, which is multiple impingements spuriously increasing etch rates. We have gathered more data on this, and are confident in our interpretation. We disagree that etching rate necessarily maps directly to a “degree of damage,” however. Damage is complex, and many types of transformation are possible.*

The fitted values of  $VT_{max}$  and  $\Delta xT_{max}$  in Table 2 show no consistent trends that might suggest these results have any meaning. It would be reasonable to expect these values to vary in a consistent manner as the degree of annealing progresses, but for annealing temperatures of 235, 270 and 280°C,  $VT_{max}$  varies from 4.0 to 1.77 and back to 3.36, while  $\Delta xT_{max}$  changes from 0.19 to 11.35 and back to 0.76. It is hard to imagine why the distribution of damage should go through such contortions within a limited range of annealing temperatures. These results suggest that the fitted values are simply empirical numbers without any real meaning. For the Linear model, values of  $VT_{max}$  change from 4.09 to 3.54 to 3.59 over the same range, compared to the value for induced tracks of 1.70, and again it is difficult to see how these numbers can be accepted as having any physical reality. This in turn raises questions regarding the significance of other aspects of the results.

*We’re just showing the results – those are the fits to the data. We can add more text to justify our two model forms as reasonable attempts at simple functions. We agree that the fluctuations in the core size of the constant-core model are a likely indicator of shortcomings in the Constant-core model. We are less alarmed by the Linear model patterns; some variation can simply reflect that we represented a complex, curved change in etching rates as a line.*

Incidentally, it would be useful to show error bars in Figure 11, as per normal practice.

*We shall do so.*

Lines 331-332: *This may be responsible for some component of the mismatch in annealing fossil versus induced tracks in laboratory experiments (Wauschkuhn et al., 2015a),*

As mentioned earlier, there is plenty of published evidence that there is no mis-match. The authors appear to have adopted this observation with no critical assessment. At the very least, the authors should mention that evidence to the contrary exists, and preferably also to explain why they discount that evidence.

*We discussed this previously in this response.*

Line 337: *treatments of fission-track lengths are all based on a line segment model*

Any mention of the line segment model should refer to Rex Galbraith's (2005) book.

*OK, we can include this one as well.*

Lines 457-457: *The  $vT(x)$  model framework provides a quantitative basis for evaluating whether the etching procedures used today are the most effective at their goal, which is to provide high numbers of reproducible and informative measurements to constrain thermal histories.*

I would dispute that the goal is simply to provide high numbers of measurements. Surely the goal should be to obtain data that provides the most accurate thermal history constraints possible. This depends not only on track length measurements but also on fission track age determinations and also on allowing for different etching rates in apatite grains on a grain mount. The  $vT(x)$  model described in the ms focusses on only one of these aspects.

*We discussed this previously in this response.*

References not cited in the ms under review:

Duddy, I.R., Green, P.F., Laslett, G.M., 1988. Thermal annealing of fission tracks in apatite 3. Variable temperature behaviour. *Chem. Geol.* 73, 25–38.

Green, P.F. and Duddy, I.R. 2018. Apatite (U-Th-Sm)/He thermochronology on the wrong side of the tracks *Chemical Geology* 488, 21–33

Green, P.F., J Duddy, I.R. & Japsen, P., 2018. Multiple episodes of regional exhumation and inversion identified in the UK Southern North Sea based on integration of palaeothermal and palaeoburial indicators. In:

Bowman, M. & Levell, B. (eds) 2018. *Petroleum Geology of NW Europe: 50 Years of Learning - Proceedings of the 8th Petroleum Geology Conference*, 47–65.

Spiegel, C, Kohn, B.P., Raza, A., Raiuner, T., Gleadow, A.J.W. 2007. The effect of low temperature exposure on apatite fission track stability: a natural annealing experiment in the deep ocean. *Geochimica et Cosmochimica Acta* 71:4512- 4537.
